# Supplementary material for: Use of Multiple Tobacco and Tobacco-Like Products Including Heated Tobacco and E-Cigarettes in Japan: A Cross-Sectional Assessment of the 2017 JASTIS Study
Source: Int J Environ Res Public Health. 2020 Mar 24;17(6):2161. doi: 10.3390/ijerph17062161 (PMC7143444; doi:10.3390/ijerph17062161)
Supplement: Supplementary file 1 [file ijerph-17-02161-s001.pdf]

## ***Supplementary data (online only)***

### **Title**

Multiple use of tobacco and tobacco-like products including heated tobacco and e-cigarettes in Japan: a cross-sectional assessment of the 2017 JASTIS study

### **Authors**

Takefumi Sugiyama<sup>1</sup>; Takahiro Tabuchi, MD, PhD<sup>2\*</sup>

### **List**

Table S1. Percentages of current use of cigarettes

Table S2. Prevalence of total, single and multiple current product use among participants in Japan (N=10114) (unweighted results)

Table S3. Percentages of current product use status according to characteristics (unweighted results)

Table S4. Predictors of multiple product use among current product users in Japan. (unweighted results)

**Table S1. Percentages of current use of cigarettes\***

| Age group (years) | Current cigarette use (%) |          |                          |
|-------------------|---------------------------|----------|--------------------------|
|                   | Unadjusted                | Adjusted | Population-based survey† |
| Both sexes        | 16.0                      | 20.1     | 23.4‡                    |
| Male              |                           |          |                          |
| Total             | 22.4                      | 31.5     | 31.1                     |
| 15-19             | 2.5                       | 2.1      | 3.8                      |
| 20-29             | 14.5                      | 24.1     | 31.1                     |
| 30-39             | 22.8                      | 34.0     | 39.9                     |
| 40-49             | 26.4                      | 35.8     | 39.4                     |
| 50-59             | 29.8                      | 34.0     | 37.1                     |
| 60-71             | 20.1                      | 32.3     | 30.0§                    |
| Female            |                           |          |                          |
| Total             | 9.4                       | 8.2      | 9.5                      |
| 15-19             | 1.2                       | 1.5      | 1.4                      |
| 20-29             | 6.6                       | 7.5      | 10.2                     |
| 30-39             | 9.2                       | 9.8      | 12.9                     |
| 40-49             | 14.0                      | 10.7     | 14.7                     |
| 50-59             | 11.2                      | 7.8      | 12.7                     |
| 60-71             | 6.7                       | 6.1      | 8.2§                     |

\*Cigarettes include factory-made and roll-your-own cigarettes. †Percentages of current smokers by age groups from a population-based survey, i.e. the CSLCPHW: in both sexes, figures for 15–19 years were from 2010 CSLCPHW and those for other age categories were from 2016 CSLCPHW. (data were available from the e-stat. URL: <https://www.e-stat.go.jp/>) ‡for 20-69 years. §for 60-69 years. CSLCPHW = Comprehensive Survey of Living Conditions of People on Health and Welfare.

**Table S2. Prevalence of total, single and multiple current product use\* among participants in Japan (N=10114) (unweighted results)**

| <b>Tobacco product use</b>                               | <b>N</b> | <b>% (95% CI)</b> |
|----------------------------------------------------------|----------|-------------------|
| Total Product Use (Tobacco and Tobacco-like Product Use) | 1771     | 17.5 (16.8–18.3)  |
| Cigarette Use                                            | 1619     | 16.0 (15.3–16.7)  |
| Single Product Use                                       | 1526     | 15.1 (14.4–15.8)  |
| Cigarettes†                                              | 1388     | 13.7 (13.1–14.4)  |
| HTPs‡                                                    | 112      | 1.1 (0.9–1.3)     |
| E-cigarettes§                                            | 15       | 0.1 (0.1–0.2)     |
| Cigars                                                   | 8        | 0.08 (0.03–0.16)  |
| Pipe/Water Pipes                                         | 3        | 0.03 (0.01–0.09)  |
| Smokeless Tobacco Products¶                              | 0        | 0.00 (0.00–0.04)  |
| Multiple Product Use                                     | 245      | 2.4 (2.1–2.7)     |
| Poly Product Use                                         | 58       | 0.6 (0.4–0.7)     |
| Dual Product Use                                         | 187      | 1.8 (1.6–2.1)     |
| Dual Product Use with Cigarettes                         | 178      | 1.8 (1.5–2.0)     |
| HTPs and Cigarettes                                      | 126      | 1.2 (1.0–1.5)     |
| E-cigarettes and Cigarettes                              | 34       | 0.3 (0.2–0.5)     |
| Cigars and Cigarettes                                    | 8        | 0.1 (0.0–0.2)     |
| Pipe/Water Pipes and Cigarettes                          | 9        | 0.09 (0.04–0.17)  |
| Smokeless Tobacco Products and Cigarettes                | 1        | 0.01 (0.00–0.06)  |
| No Current Product Use                                   | 8343     | 82.5 (81.7–83.2)  |

\*Current product use was defined as ‘use of a product even once in previous 30 days’.

†Cigarettes include factory-made and roll-your-own cigarettes.

‡HTPs include Ploom TECH, IQOS, and glo.

§E-cigarettes include e-cigarettes with/without nicotine, and e-cigarettes with unknown nicotine.

¶Smokeless tobacco products include chewing tobaccos and snus.

Abbreviations: HTPs, heated tobacco products; e-cigarettes, electronic cigarettes

**Table S3. Percentages of current product use status according to characteristics (unweighted results)**

| Characteristics                    | N     | Product Use Status, unweighted % |                  |                  |               |               |
|------------------------------------|-------|----------------------------------|------------------|------------------|---------------|---------------|
|                                    |       | Single product                   |                  | Multiple product |               |               |
|                                    |       | Any product                      | Cigarettes       | Multiple(>=2)*   | Dual*         | Poly(>=3)*    |
| <b>Overall</b>                     | 10114 | 15.1 (14.4–15.8)                 | 13.7 (13.1–14.4) | 2.4 (2.1–2.7)    | 1.8 (1.6–2.1) | 0.6 (0.4–0.7) |
| Sex                                |       |                                  |                  |                  |               |               |
| Male                               | 5142  | 20.6 (19.5–21.7)                 | 18.8 (17.7–19.9) | 3.8 (3.3–4.4)    | 2.9 (2.4–3.4) | 1.0 (0.7–1.3) |
| Female                             | 4972  | 9.4 (8.6–10.2)                   | 8.5 (7.7–9.3)    | 1.0 (0.7–1.3)    | 0.8 (0.6–1.1) | 0.2 (0.1–0.3) |
| Age group (years)                  |       |                                  |                  |                  |               |               |
| 15–24                              | 1071  | 5.2 (4.0–6.7)                    | 4.3 (3.2–5.7)    | 1.6 (0.9–2.5)    | 0.9 (0.4–1.7) | 0.7 (0.3–1.3) |
| 25–34                              | 1966  | 13.2 (11.8–14.8)                 | 10.8 (9.5–12.3)  | 3.5 (2.7–4.4)    | 2.4 (1.8–3.2) | 1.0 (0.6–1.6) |
| 35–44                              | 2143  | 17.5 (15.9–19.2)                 | 15.4 (13.9–17.0) | 3.0 (2.3–3.8)    | 2.2 (1.6–2.9) | 0.8 (0.5–1.3) |
| 45–54                              | 2017  | 19.7 (18.0–21.5)                 | 18.3 (16.7–20.1) | 2.7 (2.0–3.5)    | 2.3 (1.7–3.0) | 0.4 (0.2–0.8) |
| 55–64                              | 1835  | 17.1 (15.4–18.9)                 | 16.6 (14.9–18.4) | 1.6 (1.1–2.3)    | 1.4 (0.9–2.0) | 0.3 (0.1–0.6) |
| 65–71                              | 1082  | 11.6 (9.7–13.6)                  | 11.4 (9.5–13.4)  | 1.1 (0.6–1.9)    | 1.0 (0.5–1.8) | 0.1 (0.0–0.5) |
| Marital status                     |       |                                  |                  |                  |               |               |
| Married                            | 5791  | 15.3 (14.4–16.3)                 | 14.0 (13.1–14.9) | 2.3 (2.0–2.8)    | 1.8 (1.5–2.2) | 0.6 (0.4–0.8) |
| Never married                      | 3622  | 13.2 (12.1–14.4)                 | 11.8 (10.8–12.9) | 2.6 (2.1–3.2)    | 1.9 (1.5–2.4) | 0.7 (0.4–1.0) |
| Widowed/divorced                   | 701   | 23.0 (19.9–26.3)                 | 21.5 (18.6–24.8) | 2.3 (1.3–3.7)    | 2.1 (1.2–3.5) | 0.1 (0.0–0.8) |
| Education                          |       |                                  |                  |                  |               |               |
| Junior high school                 | 278   | 20.9 (16.2–26.1)                 | 17.6 (13.3–22.6) | 4.3 (2.3–7.4)    | 4.0 (2.0–7.0) | 0.4 (0.0–2.0) |
| High school                        | 2819  | 17.5 (16.1–19.0)                 | 16.2 (14.9–17.7) | 2.7 (2.1–3.4)    | 2.3 (1.8–3.0) | 0.4 (0.2–0.7) |
| Technical school or junior college | 2269  | 13.9 (12.5–15.4)                 | 12.5 (11.2–13.9) | 1.3 (0.9–1.9)    | 0.9 (0.6–1.4) | 0.4 (0.2–0.8) |
| University (4 years or more)       | 4748  | 13.9 (12.9–14.9)                 | 12.6 (11.6–13.6) | 2.7 (2.2–3.2)    | 1.9 (1.5–2.3) | 0.8 (0.6–1.1) |
| Self-rated health                  |       |                                  |                  |                  |               |               |

|                                        |      |                  |                  |               |               |               |
|----------------------------------------|------|------------------|------------------|---------------|---------------|---------------|
| Good                                   | 5648 | 14.2 (13.3–15.1) | 12.9 (12.0–13.8) | 2.4 (2.0–2.8) | 1.8 (1.5–2.2) | 0.6 (0.4–0.8) |
| Middle                                 | 3394 | 17.3 (16.0–18.6) | 15.8 (14.6–17.1) | 2.4 (1.9–3.0) | 1.9 (1.5–2.4) | 0.5 (0.3–0.8) |
| Poor                                   | 1072 | 12.8 (10.8–14.9) | 11.4 (9.5–13.4)  | 2.9 (2.0–4.1) | 2.1 (1.3–3.1) | 0.8 (0.4–1.6) |
| Workplace indoor smoking ban status    |      |                  |                  |               |               |               |
| No ban (including smoking room/corner) | 6594 | 17.0 (16.1–17.9) | 15.3 (14.5–16.2) | 3.0 (2.6–3.5) | 2.4 (2.0–2.7) | 0.7 (0.5–0.9) |
| Complete ban                           | 418  | 30.9 (26.5–35.5) | 26.3 (22.2–30.8) | 5.0 (3.1–7.6) | 3.8 (2.2–6.1) | 1.2 (0.4–2.8) |
| Not working/did not know               | 3102 | 9.0 (8.0–10.0)   | 8.6 (7.7–9.7)    | 0.8 (0.5–1.1) | 0.5 (0.3–0.8) | 0.3 (0.1–0.5) |
| Risk perception of cigarettes          |      |                  |                  |               |               |               |
| Yes (perceived risk)                   | 9121 | 12.6 (11.9–13.3) | 11.3 (10.6–11.9) | 2.1 (1.9–2.5) | 1.6 (1.4–1.9) | 0.5 (0.4–0.7) |
| No (did not perceive risk)             | 993  | 38.4 (35.3–41.5) | 36.4 (33.4–39.4) | 5.0 (3.8–6.6) | 3.7 (2.6–5.1) | 1.3 (0.7–2.2) |
| Risk perception of e-cigarettes/HTPs   |      |                  |                  |               |               |               |
| No (perceived risk)                    | 6081 | 16.1 (15.2–17.1) | 14.6 (13.8–15.5) | 2.5 (2.2–3.0) | 1.9 (1.6–2.3) | 0.7 (0.5–0.9) |
| Yes (did not perceive risk)            | 2077 | 17.2 (15.6–18.9) | 15.1 (13.6–16.7) | 3.9 (3.1–4.8) | 3.2 (2.5–4.0) | 0.7 (0.4–1.1) |
| Did not know e-cigarettes/HTPs         | 1956 | 9.6 (8.3–11.0)   | 9.4 (8.1–10.8)   | 0.5 (0.2–0.9) | 0.3 (0.1–0.7) | 0.2 (0.1–0.5) |

---

\*Dual, poly and multiple product use were defined as current use of two, more than two and more than one tobacco product(s), respectively.

**Table S4. Predictors of multiple product use among current product users in Japan (unweighted results)**

| Variables                              | Adjusted ORs* (95% CI)  | P <sup>†</sup> |
|----------------------------------------|-------------------------|----------------|
| Sex                                    |                         | 0.003          |
| Male                                   | <b>1.69 (1.18–2.43)</b> |                |
| Female                                 | 1 (reference)           |                |
| Age group (years)                      |                         | 0.001          |
| 15–24                                  | 1.81 (0.97–3.41)        |                |
| 25–34                                  | 1.42 (0.97–2.10)        |                |
| 35–44                                  | 1 (reference)           |                |
| 45–54                                  | 0.76 (0.51–1.13)        |                |
| 55–64                                  | <b>0.56 (0.35–0.90)</b> |                |
| 65–71                                  | 0.67 (0.33–1.35)        |                |
| Marital status                         |                         | 0.795          |
| Married                                | 1 (reference)           |                |
| Never married                          | 0.98 (0.71–1.35)        |                |
| Widowed/divorced                       | 0.83 (0.47–1.45)        |                |
| Education                              |                         | 0.056          |
| Junior high school                     | 1.06 (0.53–2.12)        |                |
| High school                            | 0.88 (0.64–1.21)        |                |
| Technical school or junior college     | <b>0.56 (0.36–0.87)</b> |                |
| University (4 years or more)           | 1 (reference)           |                |
| Self-rated health                      |                         | 0.052          |
| Good                                   | 1.16 (0.85–1.57)        |                |
| Middle                                 | 1 (reference)           |                |
| Poor                                   | <b>1.82 (1.14–2.92)</b> |                |
| Workplace indoor smoking ban status    |                         | 0.270          |
| No ban (including smoking room/corner) | 0.99 (0.60–1.64)        |                |
| Complete ban                           | 1 (reference)           |                |
| Not working/did not know               | 0.67 (0.35–1.29)        |                |
| Risk perception of cigarettes          |                         | 0.409          |
| Yes (perceived risk)                   | 1 (reference)           |                |
| No (did not perceive risk)             | 0.87 (0.61–1.22)        |                |
| Risk perception of e-cigarettes/HTPs   |                         | <0.001         |
| No (perceived risk)                    | 1 (reference)           |                |
| Yes (did not perceive risk)            | <b>1.58 (1.16–2.15)</b> |                |
| Did not know e-cigarettes/HTPs         | <b>0.43 (0.22–0.85)</b> |                |

\*Adjusted for all listed variables. <sup>†</sup> P for difference
